# Supplementary material for: Proton conductor NASICON-structure Li1+xCdx/2Zr2−x/2(PO4)3 as solid electrolyte for intermediate-temperature fuel cells
Source: Royal Society of Chemistry journal article supplement (doi:10.1039/d3ta05182j), 2024-01-01
Supplement: d3ta05182j1.pdf [file d3ta05182j1.pdf]

## Supplementary Information

### **Proton conductor NASICON-structure $\text{Li}_{1+x}\text{Cd}_{x/2}\text{Zr}_{2-x/2}(\text{PO}_4)_3$ as solid electrolyte for Intermediate-temperature fuel cell**

Xiuxiu Li,<sup>a</sup> Enyi Hu,<sup>a</sup> Faze Wang,<sup>\*a</sup> Peter Lund,<sup>b</sup> Bin Zhu,<sup>a</sup> and Jun Wang <sup>\*a</sup>

<sup>a</sup>*Jiangsu Provincial Key Laboratory of Solar Energy Science and Technology, School of Energy & Environment, Southeast University, Nanjing 210096, China*

<sup>b</sup>*Department of Engineering Physics/Advanced Energy Systems, School of Science, Aalto University, Aalto 00076, Finland*

<sup>\*</sup>*Correspondence to: fazewang@seu.edu.cn (F. Wang), wj-jw@seu.edu.cn (J. Wang).*

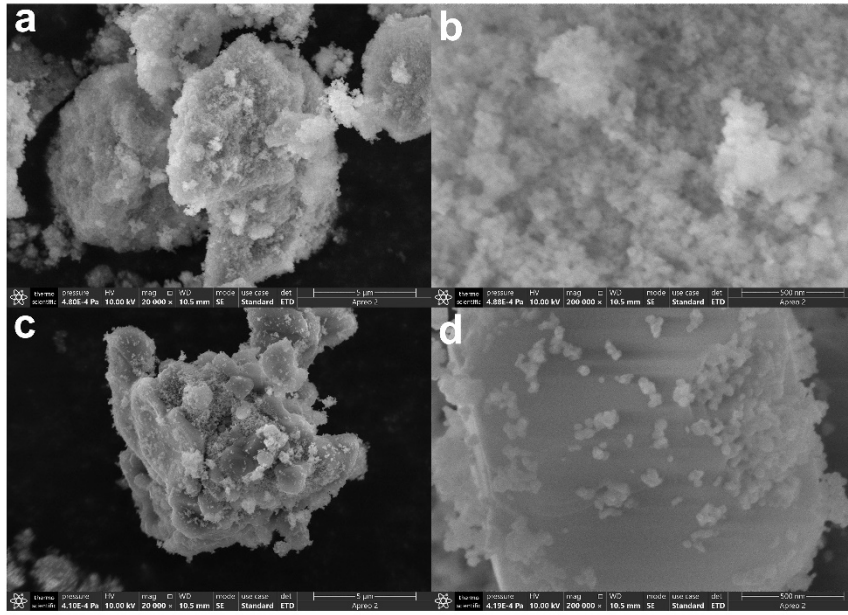

**Fig. S1** SEM analysis of (a-b)  $\text{Li}_3\text{Cd}_1\text{Zr}_1(\text{PO}_4)_3$  and (c-d)  $\text{CdZr}_4(\text{PO}_4)_6$  samples.

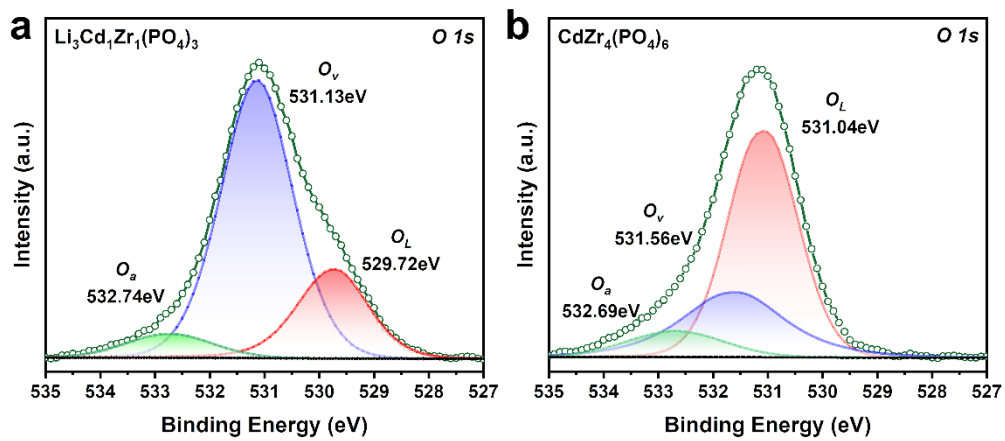

**Fig. S2** XPS spectra of O 1s for (a)  $\text{Li}_3\text{Cd}_1\text{Zr}_1(\text{PO}_4)_3$  and (b)  $\text{CdZr}_4(\text{PO}_4)_6$  samples.

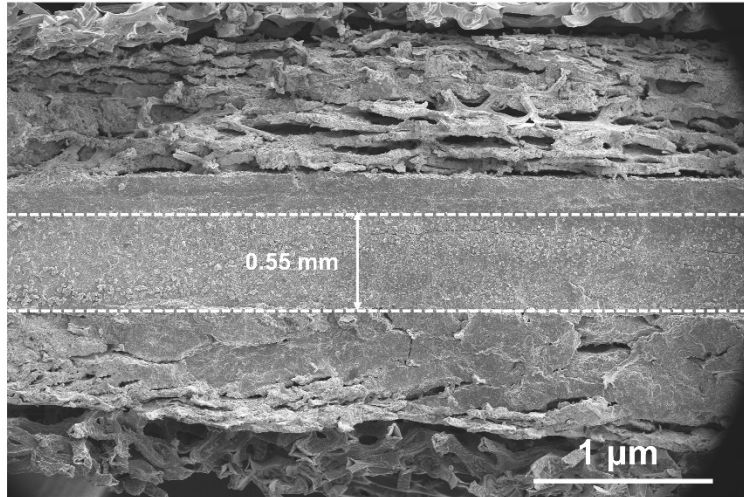

**Fig. S3** Cross-section SEM image of  $\text{Li}_3\text{Cd}_1\text{Zr}_1(\text{PO}_4)_3$  fuel cell device.

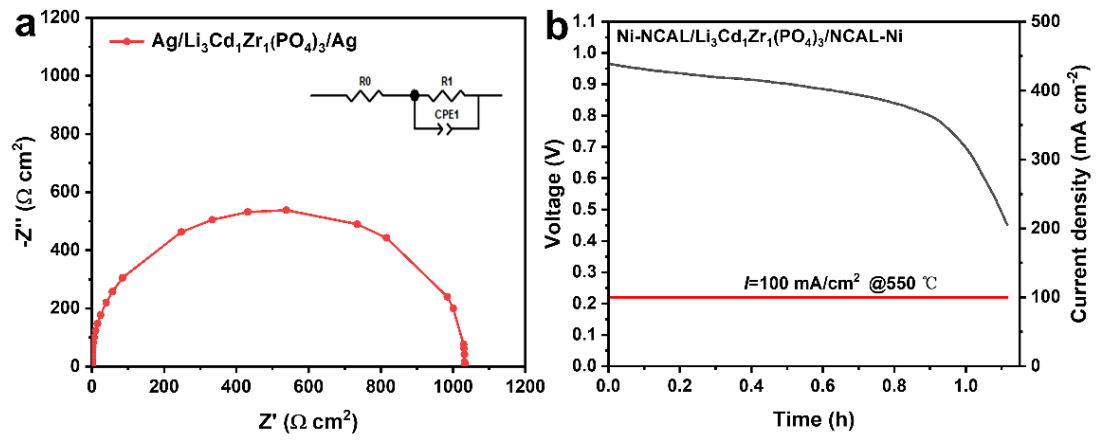

**Fig. S4** (a) Electrochemical impedance spectroscopy (EIS) plots of the Ag/  $\text{Li}_3\text{Cd}_1\text{Zr}_1(\text{PO}_4)_3$  /Ag device at 550 °C. (b) Durability performance test of  $\text{Li}_3\text{Cd}_1\text{Zr}_1(\text{PO}_4)_3$  device without protection layer at 550 °C.

**Table S1**

EIS simulation results of  $\text{Li}_{1+x}\text{Cd}_{x/2}\text{Zr}_{2-x/2}(\text{PO}_4)_3$  ( $x=0.5,1,1.5,2$ ) and  $\text{CdZr}_4(\text{PO}_4)_6$  fuel cell devices under  $\text{H}_2/\text{air}$  conditions at 550 °C.

|                                                                  | $R_0$   | $\text{CPE}_1\text{-T}$ | $\text{CPE}_1\text{-P}$ | $R_1$   | $\text{CPE}_2\text{-T}$ | $\text{CPE}_2\text{-P}$ | $R_2$   |
|------------------------------------------------------------------|---------|-------------------------|-------------------------|---------|-------------------------|-------------------------|---------|
| $\text{Li}_3\text{Cd}_1\text{Zr}_1(\text{PO}_4)_3$               | 0.45458 | 0.10283                 | 0.83980                 | 0.07546 | 0.90656                 | 0.67246                 | 0.22876 |
| $\text{Li}_{2.5}\text{Cd}_{0.75}\text{Zr}_{1.25}(\text{PO}_4)_3$ | 0.49813 | 0.05835                 | 0.92439                 | 0.04618 | 3.23800                 | 0.47331                 | 0.24299 |
| $\text{Li}_2\text{Cd}_{0.5}\text{Zr}_{1.5}(\text{PO}_4)_3$       | 0.55451 | 0.07129                 | 0.82749                 | 0.08041 | 3.01400                 | 0.46587                 | 0.26833 |
| $\text{Li}_{1.5}\text{Cd}_{0.25}\text{Zr}_{1.75}(\text{PO}_4)_3$ | 0.69609 | 0.00016                 | 1.51900                 | 0.01086 | 0.01058                 | 1.00400                 | 0.07542 |
| $\text{CdZr}_4(\text{PO}_4)_6$                                   | 0.96314 | 4.22E-12                | 3.28500                 | 0.02862 | 0.01788                 | 0.90184                 | 0.14331 |

**Table S2**

EIS simulation results of NCAL/  $\text{Li}_3\text{Cd}_1\text{Zr}_1(\text{PO}_4)_3$  /NCAL sample under  $\text{H}_2$ /air conditions in 460-550 °C.

|        | $R_0$   | $\text{CPE}_1\text{-T}$ | $\text{CPE}_1\text{-P}$ | $R_1$   | $\text{CPE}_2\text{-T}$ | $\text{CPE}_2\text{-P}$ | $R_2$   |
|--------|---------|-------------------------|-------------------------|---------|-------------------------|-------------------------|---------|
| 550 °C | 0.45458 | 0.10283                 | 0.83980                 | 0.07546 | 0.90656                 | 0.67246                 | 0.22876 |
| 520 °C | 0.51269 | 0.08595                 | 0.79216                 | 0.11345 | 0.89905                 | 0.61399                 | 0.18567 |
| 490 °C | 0.54158 | 0.10640                 | 0.67100                 | 0.27597 | 2.54300                 | 0.55208                 | 0.32452 |
| 460 °C | 0.58895 | 0.06660                 | 0.72153                 | 0.33522 | 1.02100                 | 0.60640                 | 0.65182 |
